# Supplementary material for: Synthesis of a Novel Linear α, ω-Di (Chloro Phosphoramide) Polydimethylsiloxane and Its Applications in Improving Flame-Retardant and Water-Repellent Properties of Cotton Fabrics
Source: PubMed Central journal article supplement (PMC6918139; doi:10.3390/polym11111829), 2019-11-07
Supplement: polymers-11-01829-s001.pdf [file polymers-11-01829-s001.pdf]

# Synthesis of a novel linear $\alpha$ , $\omega$ -di (chloro phosphoramidate) polydimethylsiloxane and its applications in improving flame-retardant and water-repellent properties of cotton fabrics

Chaohong Dong, Ling Sun, Xingbo Ma, Zhou Lu \*, Pengshuang He, Ping Zhu \*

Institute of Functional Textiles and Advanced Materials, State Key Laboratory of Bio-Fibers and Eco-Textiles, College of Textile and Clothing, Qingdao University, Qingdao 266000, China.

## Electronic Supplementary information

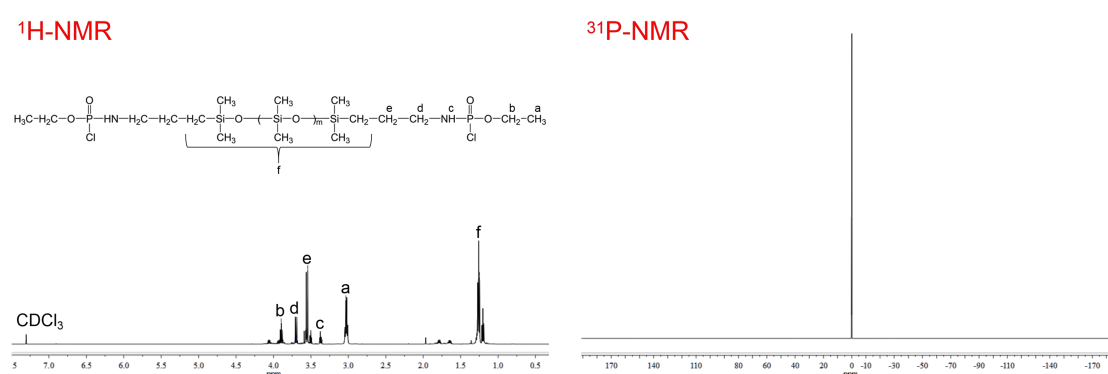

Figure S1.  $^1\text{H}$  NMR and  $^{31}\text{P}$  NMR spectra of CPN-PDMS.

$^1\text{H}$  NMR and  $^{31}\text{P}$  NMR spectrum of CPN-PDMS are presented in Fig. S1. As shown in the  $^1\text{H}$  NMR spectra, the peaks appeared at 2.95-3.08 ppm, 3.84-3.92 ppm corresponding to  $-\text{CH}_3$  and  $-\text{CH}_2-$  of dichloroethyl phosphate. The peaks at 3.65-3.72 ppm, 3.48-3.59 ppm and 1.15-1.36 ppm were attributed to d, e and f (derived from PDMS- $2\text{NH}_2$ ). Furthermore, the peak of  $-\text{NH}-$  group connecting dichloroethyl phosphate with PDMS- $2\text{NH}_2$  in the  $^1\text{H}$  NMR spectra was shown at 3.30-3.41 ppm, which suggests successful reaction happens between dichloroethyl phosphate with PDMS- $2\text{NH}_2$ . The single signal at -0.05 ppm in the  $^{31}\text{P}$  NMR spectra was corresponded with the unique phosphorus in the CPN-PDMS, indicating that this product has a high purity.
